# Supplementary material
Source: MDPI journal article supplement (https://www.mdpi.com/2304-6740/6/4/132)
Supplement: s1 [file s1]

**Supplementary information**  
**Anti-proliferative and anti-migration activity of arene-ruthenium(II)**  
**complexes with azole therapeutic agents**

Legna Colina-Vegas, Katia M. de Oliveira, Beatriz N. Cunha, Marcia Cominetti, Maribel Navarro<sup>\*</sup>, Alzir Azevedo Batista<sup>\*</sup>

Table of contents

Fig S1. Spectrofluorometric titration spectra of HSA with the ruthenium compounds **2-4**.

Fig S2.  $^1\text{H}$  NMR spectrum of guanosine and complex **3** at different times (only resonances of  $\text{H}_8$ ,  $\text{NH}$  and  $\text{NH}_2$  are assignments).

Fig S3. Hoechst 33258 (H33258) displacement assay for metal complexes **2-4**.

Fig S4.  $^{31}\text{P}\{^1\text{H}\}$  NMR spectrum in the mixture 70:30 DMSO: Culture medium (DMEM) of complex **3** at different times.

Equation description:

Classical Stern–Volmer equation (1) was used to determine the Stern–Volmer quenching constant ( $K_{sv}$ ):

$$F_0/F = 1 + K_q\tau_0[Q] = 1 + K_{sv}[Q] \quad (1)$$

where  $F_0$  and  $F$  are the fluorescence intensities in the absence and presence of quencher, respectively,  $[Q]$  is the quencher concentration.

Binding constant ( $K_b$ ) and number of binding sites ( $n$ ) were determined by plotting the double log graph of the fluorescence data using the equation (2):

$$\log [(F_0-F)/F] = \log K_b + n\log[Q] \quad (2)$$

The thermodynamic parameters were calculated from equations (3) and (4):

$$\ln (K_2/K_1) = [(1/T_1)-(1/T_2)]\Delta H/R \quad (3)$$

where  $K_1$  and  $K_2$  are the binding constants at temperatures  $T_1$  and  $T_2$ , respectively, and enthalpy ( $\Delta H$ ) and  $R$  is the gas constant.

Additionally, the change in free energy ( $\Delta G$ ) and entropy ( $\Delta S$ ) were calculated from the following equation:

$$\Delta G = -RT \ln K = \Delta H - T\Delta S \quad (4)$$

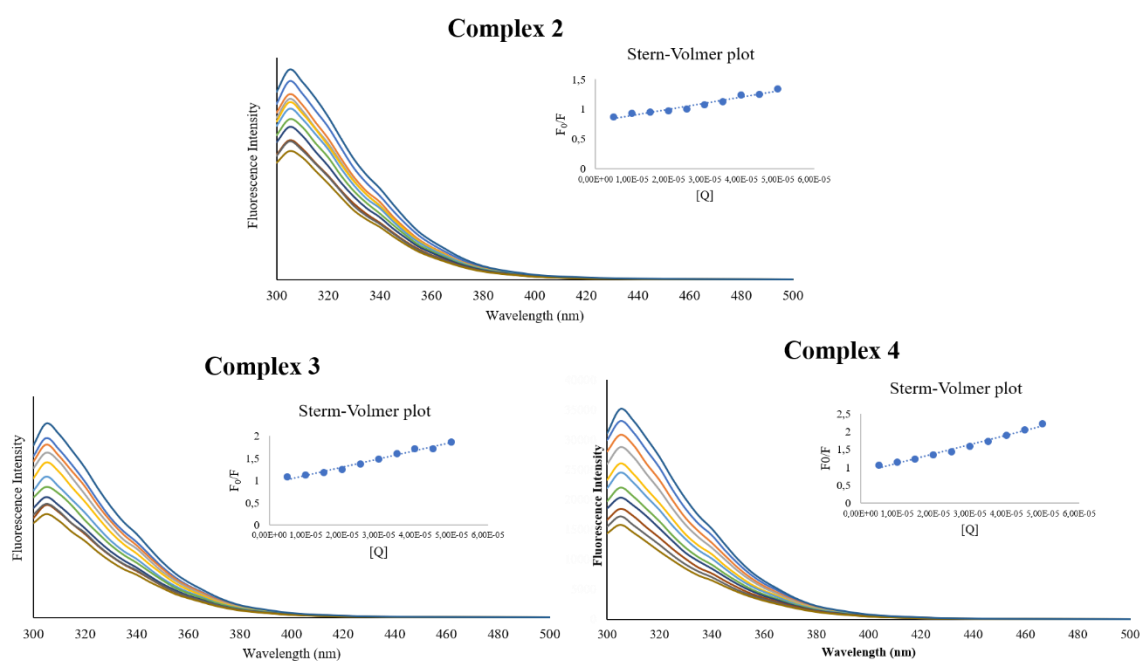

Fig S1. Spectrofluorometric titration spectra of HSA with the ruthenium compounds **2-4**

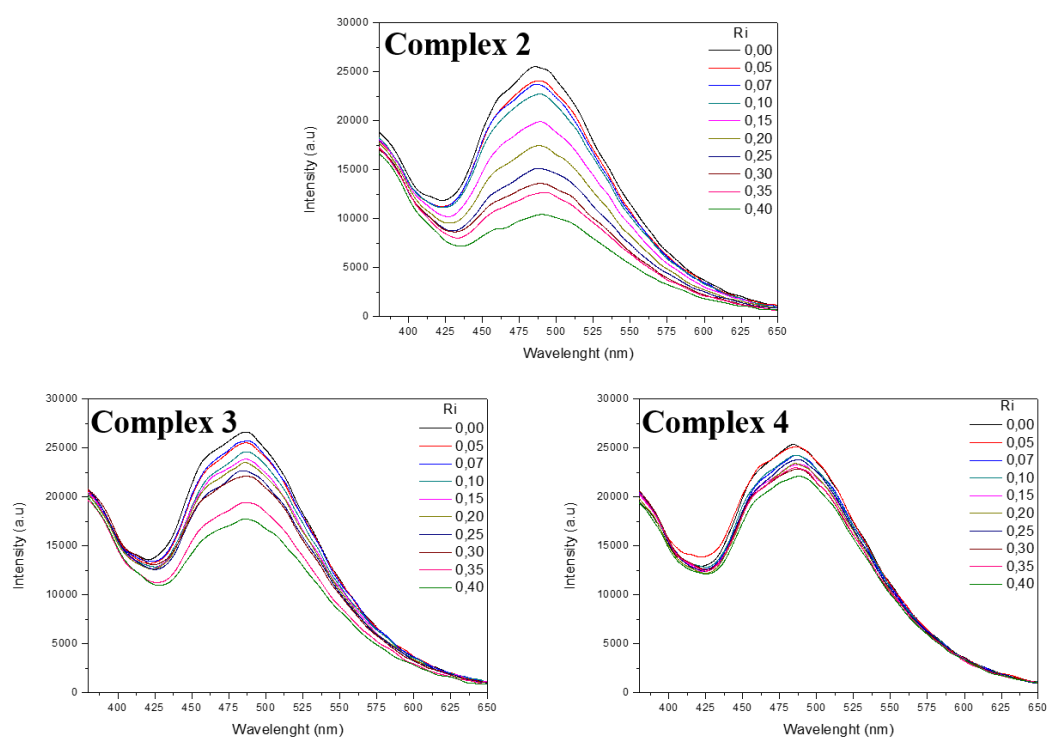

Fig S2. Hoechst 33258 (H33258) displacement assay for metal complexes **2-4**

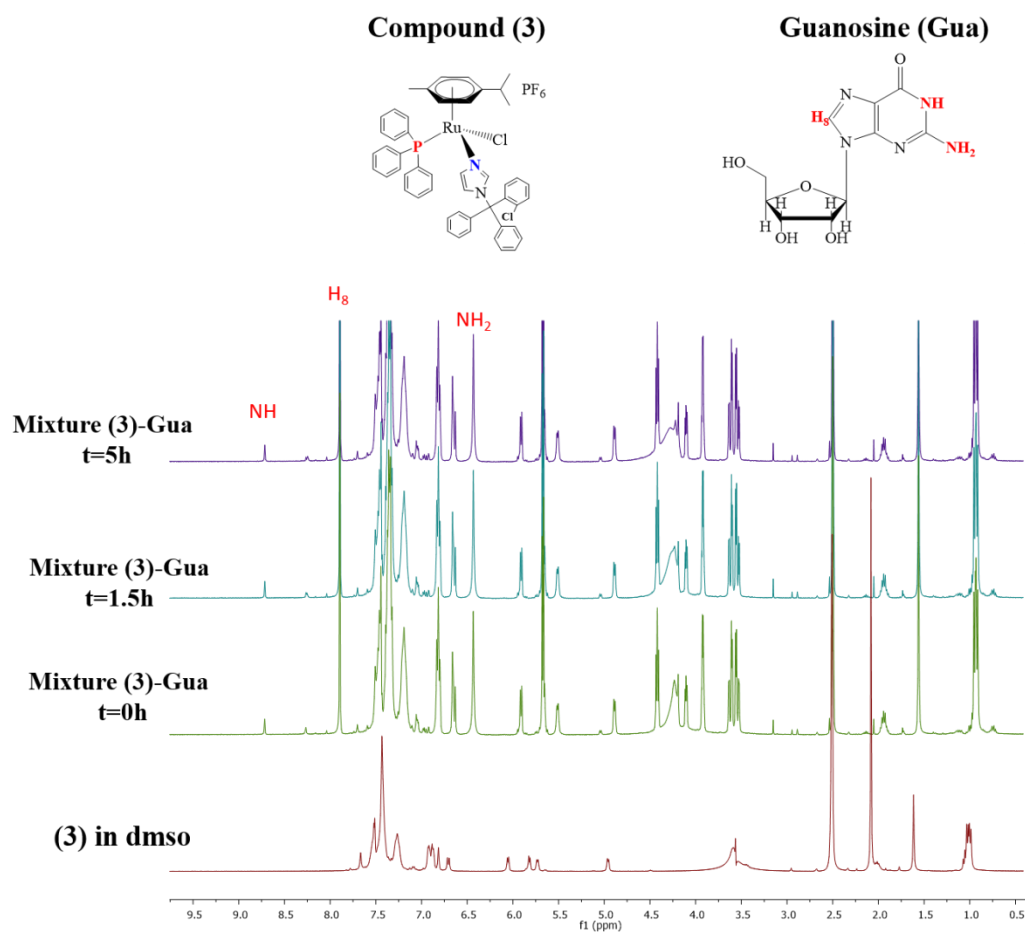

Fig S3.  $^1\text{H}$  NMR spectrum of guanosine and complex **3** at different times (only resonances of  $\text{H}_8$ ,  $\text{NH}$  and  $\text{NH}_2$  are assignments)

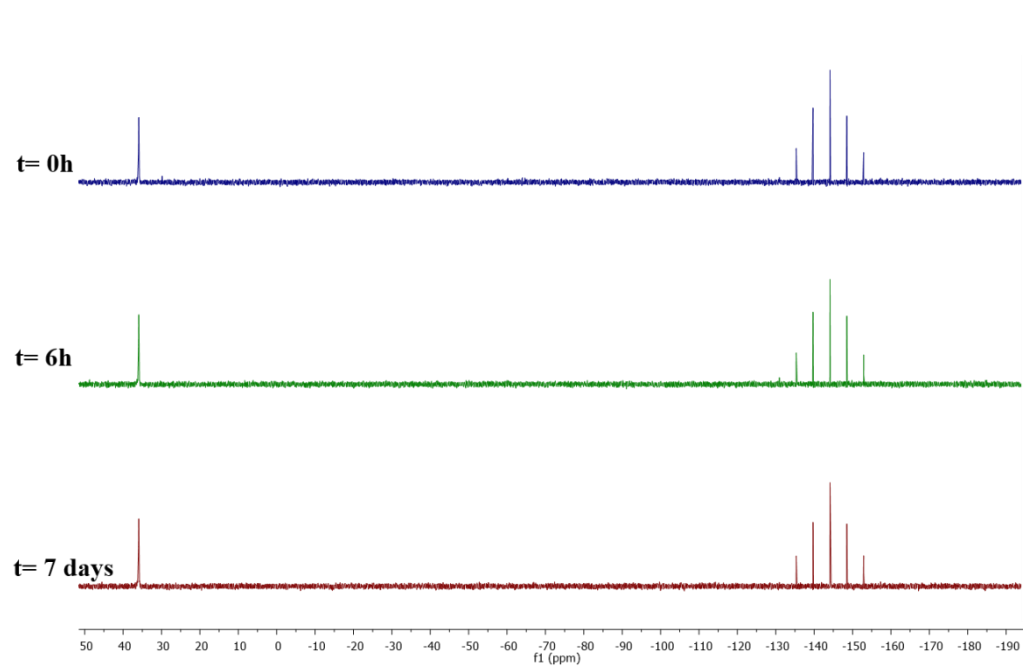

Fig S4.  $^{31}\text{P}\{^1\text{H}\}$  NMR spectrum in the mixture 70:30 DMSO:Culture medium (DMEM) of complex **3** at different times
